# Supplementary material for: MLVA-16 typing of 295 marine mammal Brucella isolates from different animal and geographic origins identifies 7 major groups within Brucella ceti and Brucella pinnipedialis
Source: Springer Nature journal article supplement (doi:10.1186/1471-2180-9-145), 2009-07-20
Supplement: 12866_2009_816_MOESM2_ESM.pdf [file 12866_2009_816_MOESM2_ESM.pdf]

« Cluster A »

« A1 »

« A2 »

« Cluster B »

| Key     | genotype | strain_id    | organ                         | year | host                 | Host (latin)                      | country     | panel1 | ST   |
|---------|----------|--------------|-------------------------------|------|----------------------|-----------------------------------|-------------|--------|------|
| bmar156 | 1        | M642/99/2    | brain                         | 1999 | striped dolphin      | <i>Stenella coeruleoalba</i>      | Scotland    | 24     | ST26 |
| bmar375 | 1        | M105/06/8    | liver                         | 2006 | AWSD                 | <i>Lagenorhynchus acutus</i>      | Scotland    | 24     |      |
| bmar283 | 2        | M42/07/1     | liver                         | 2007 | AWSD                 | <i>Lagenorhynchus acutus</i>      | Scotland    | 24     |      |
| bmar312 | 3        | M57/07/1     | spleen                        | 2007 | AWSD                 | <i>Lagenorhynchus acutus</i>      | Scotland    | 24     |      |
| bmar259 | 3        | CITA         | spleen                        | 2004 | striped dolphin      | <i>Stenella coeruleoalba</i>      | Spain       | 24     |      |
| bmar382 | 4        | M260/03/1    | brain                         | 2003 | AWSD                 | <i>Lagenorhynchus acutus</i>      | Scotland    | 24     |      |
| bmar167 | 4        | M22/02/1     | mesenteric LN                 | 2002 | striped dolphin      | <i>Stenella coeruleoalba</i>      | Scotland    | 24     |      |
| bmar113 | 5        | M18/96/1     | sub-cutaneous lesion          | 1996 | AWSD                 | <i>Lagenorhynchus acutus</i>      | Scotland    | 24     |      |
| bmar011 | 6        | M644/93/1    | sub-cutaneous lesion          | 1993 | common dolphin       | <i>Delphinus delphis</i>          | Scotland    | 24     | ST26 |
| bmar166 | 6        | M9/02/01     | sub-blubber abscess           | 2002 | striped dolphin      | <i>Stenella coeruleoalba</i>      | Scotland    | 24     |      |
| bmar110 | 6        | M40/95/1     | sub-cutaneous lesion          | 1995 | striped dolphin      | <i>Stenella coeruleoalba</i>      | Scotland    | 24     | ST26 |
| bmar255 | 7        | M13/05/1     | brain                         | 2005 | striped dolphin      | <i>Stenella coeruleoalba</i>      | Scotland    | 24     | ST26 |
| bmar292 | 8        | M222/07/1    | liver                         | 2007 | AWSD                 | <i>Lagenorhynchus acutus</i>      | Scotland    | 24     |      |
| bmar262 | 9        | M656/99/1    | brain                         | 1999 | striped dolphin      | <i>Stenella coeruleoalba</i>      | Scotland    | 24     | ST26 |
| bmar014 | 10       | M2194/94/1   | spleen                        | 1994 | striped dolphin      | <i>Stenella coeruleoalba</i>      | Scotland    | 24     | ST26 |
| bmar290 | 11       | M158/06/1    | brain                         | 2006 | AWSD                 | <i>Lagenorhynchus acutus</i>      | Scotland    | 24     |      |
| bmar367 | 12       | M35/08/2     | kidney                        | 2008 | minke whale          | <i>Balaenoptera acutorostrata</i> | Scotland    | 24     |      |
| bmar322 | 13       | M52/07/1     | spleen                        | 2007 | AWSD                 | <i>Lagenorhynchus acutus</i>      | Scotland    | 24     |      |
| bmar329 | 14       | M66/06/1     | kidney                        | 2006 | AWSD                 | <i>Lagenorhynchus acutus</i>      | Scotland    | 77     |      |
| bmar284 | 14       | M83/07/1     | kidney                        | 2007 | AWSD                 | <i>Lagenorhynchus acutus</i>      | Scotland    | 77     |      |
| bmar363 | 15       | M267/05/1    | colorectal LN                 | 2005 | AWSD                 | <i>Lagenorhynchus acutus</i>      | Scotland    | 77     |      |
| bmar153 | 16       | M654/99/1    | brain                         | 1999 | striped dolphin      | <i>Stenella coeruleoalba</i>      | Scotland    | 77     | ST26 |
| bmar368 | 17       | M231/07/2    | brain                         | 1999 | bottlenose dolphin   | <i>Tursiops truncatus</i>         | Scotland    | 77     |      |
| bmar298 | 18       | M231/07/3    | kidney                        | 2007 | bottlenose dolphin   | <i>Tursiops truncatus</i>         | Scotland    | 77     |      |
| bmar103 | 19       | M1068/91/2   | sub-cutaneous lesion          | 1991 | porpoise             | <i>Phocoena phocoena</i>          | Scotland    | 23     |      |
| bmar111 | 20       | M490/95/1    |                               | 1995 | harbour seal         | <i>Phoca vitulina</i>             | Scotland    | 23     | ST23 |
| bmar187 | 21       | M89/05/1     | spleen                        | 2005 | porpoise             | <i>Phocoena phocoena</i>          | Scotland    | 69     | ST23 |
| bmar108 | 22       | M997/94/2    |                               | 1994 | AWSD                 | <i>Lagenorhynchus acutus</i>      | Scotland    | 69     |      |
| bmar371 | 23       | M85/06/3     | atlanto-occipital pus         | 2006 | porpoise             | <i>Phocoena phocoena</i>          | Scotland    | 23     |      |
| bmar158 | 24       | M2/00/1      | internal inguinal LN          | 2000 | AWSD                 | <i>Lagenorhynchus acutus</i>      | Scotland    | 23     |      |
| bmar232 | 25       | M130/03/2    | lung                          | 2003 | porpoise             | <i>Phocoena phocoena</i>          | Scotland    | 23     |      |
| bmar220 | 26       | M12/00/3     | lung                          | 2000 | porpoise             | <i>Phocoena phocoena</i>          | Scotland    | 23     |      |
| bmar157 | 27       | M575/99/4    | brain                         | 1999 | porpoise             | <i>Phocoena phocoena</i>          | Scotland    | 23     |      |
| bmar359 | 28       | M311/03/5    | liver abscess or uterine swab | 2003 | porpoise             | <i>Phocoena phocoena</i>          | Scotland    | 23     |      |
| bmar117 | 29       | M854/98/8    | kidney                        | 1998 | porpoise             | <i>Phocoena phocoena</i>          | Scotland    | 23     |      |
| bmar223 | 30       | M130/02/2    | lung                          | 2002 | porpoise             | <i>Phocoena phocoena</i>          | Scotland    | 23     | ST23 |
| bmar270 | 31       | M55/07/1     | kidney                        | 2007 | porpoise             | <i>Phocoena phocoena</i>          | Netherlands | 23     |      |
| bmar338 | 31       | M67/07/3     | lung                          | 2007 | porpoise             | <i>Phocoena phocoena</i>          | Scotland    | 23     |      |
| bmar152 | 32       | M563/99/2    | lung                          | 1999 | porpoise             | <i>Phocoena phocoena</i>          | Scotland    | 23     | ST23 |
| bmar114 | 33       | M515/96/2    | spinal lesion                 | 1996 | porpoise             | <i>Phocoena phocoena</i>          | Scotland    | 23     | ST23 |
| bmar306 | 34       | M99/07/1     | spleen                        | 2007 | porpoise             | <i>Phocoena phocoena</i>          | Scotland    | 23     |      |
| bmar164 | 34       | M49/01/1     | spleen                        | 2001 | porpoise             | <i>Phocoena phocoena</i>          | Scotland    | 23     |      |
| bmar112 | 35       | M2438/95/1   |                               | 1995 | AWSD                 | <i>Lagenorhynchus acutus</i>      | Scotland    | 23     |      |
| bmar185 | 36       | M51/04/2     | mammary gland                 | 2004 | porpoise             | <i>Phocoena phocoena</i>          | Scotland    | 23     |      |
| bmar118 | 37       | M1747/98/3   | spleen or mesenteric LN       | 1998 | porpoise             | <i>Phocoena phocoena</i>          | Scotland    | 23     |      |
| bmar016 | 38       | M870/97/1    | liver                         | 1997 | white-beaked dolphin | <i>Lagenorhynchus albirostris</i> | Scotland    | 23     |      |
| bmar174 | 39       | M23/03/4     | liver                         | 2003 | porpoise             | <i>Phocoena phocoena</i>          | Scotland    | 23     |      |
| bmar257 | 40       | M120/05/1    | mesenteric LN                 | 2005 | porpoise             | <i>Phocoena phocoena</i>          | Scotland    | 23     | ST23 |
| bmar015 | 40       | M181/97/1    | spleen lesion                 | 1997 | AWSD                 | <i>Lagenorhynchus acutus</i>      | Scotland    | 23     | ST23 |
| bmar182 | 41       | M58/05/1     | kidney                        | 2005 | porpoise             | <i>Phocoena phocoena</i>          | Scotland    | 23     | ST23 |
| bmar346 | 41       | M186/07/12   | spleen                        | 2007 | porpoise             | <i>Phocoena phocoena</i>          | Scotland    | 23     |      |
| bmar115 | 42       | M452/97/2    | spleen                        | 1997 | common dolphin       | <i>Delphinus delphis</i>          | Scotland    | 23     | ST23 |
| bmar162 | 43       | M187/00/1    | spleen                        | 2000 | AWSD                 | <i>Lagenorhynchus acutus</i>      | Scotland    | 23     | ST23 |
| bmar281 | 44       | M70/02/1     | spinal lesion                 | 2002 | porpoise             | <i>Phocoena phocoena</i>          | Scotland    | 23     |      |
| bmar256 | 45       | M100/04/6    | lung                          | 2004 | porpoise             | <i>Phocoena phocoena</i>          | Scotland    | 23     |      |
| bmar297 | 45       | M137/05/5    | kidney                        | 2005 | porpoise             | <i>Phocoena phocoena</i>          | Scotland    | 23     | ST23 |
| bmar150 | 46       | M610/99/1    | liver                         | 1999 | porpoise             | <i>Phocoena phocoena</i>          | Scotland    | 23     |      |
| bmar175 | 47       | M89/03/5     | brain                         | 2003 | porpoise             | <i>Phocoena phocoena</i>          | Scotland    | 23     |      |
| bmar176 | 47       | M165/03/6    | spleen                        | 2003 | porpoise             | <i>Phocoena phocoena</i>          | Scotland    | 23     |      |
| bmar102 | 48       | 7763/2       |                               | 1997 | bottlenose dolphin   | <i>Tursiops truncatus</i>         | France      | 23     | ST23 |
| bmar159 | 48       | M499/99/5    | spleen                        | 1999 | porpoise             | <i>Phocoena phocoena</i>          | Scotland    | 23     |      |
| bmar012 | 48       | M1570/94/1   | blood                         | 1994 | porpoise             | <i>Phocoena phocoena</i>          | Scotland    | 23     | ST23 |
| bmar280 | 49       | M83/01/4     | spleen                        | 2001 | porpoise             | <i>Phocoena phocoena</i>          | Scotland    | 23     |      |
| bmar286 | 50       | M39/06/6     | lung                          | 2006 | porpoise             | <i>Phocoena phocoena</i>          | Scotland    | 23     |      |
| bmar381 | 50       | M99/07/2     | kidney                        | 2007 | porpoise             | <i>Phocoena phocoena</i>          | Scotland    | 23     |      |
| bmar214 | 50       | M103/99/1    | thoracic fluid                | 1999 | porpoise             | <i>Phocoena phocoena</i>          | Scotland    | 23     |      |
| bmar323 | 51       | M24/08/1     | lung                          | 2008 | porpoise             | <i>Phocoena phocoena</i>          | Scotland    | 23     |      |
| bmar266 | 51       | M245/05/2    | testicular abscess            | 2005 | porpoise             | <i>Phocoena phocoena</i>          | Scotland    | 23     |      |
| bmar013 | 51       | M1661/94/2   | uterus                        | 1994 | porpoise             | <i>Phocoena phocoena</i>          | Scotland    | 23     | ST23 |
| bmar151 | 52       | M615/99/2    | epididymis                    | 1999 | porpoise             | <i>Phocoena phocoena</i>          | Scotland    | 23     |      |
| bmar379 | 52       | M245/05/4    | liver                         | 2005 | porpoise             | <i>Phocoena phocoena</i>          | Scotland    | 23     |      |
| bmar230 | 52       | M108/03/1    | lung                          | 2003 | porpoise             | <i>Phocoena phocoena</i>          | Scotland    | 23     |      |
| bmar294 | 53       | M181/07/7    | MLN                           | 2007 | porpoise             | <i>Phocoena phocoena</i>          | Scotland    | 23     |      |
| bmar231 | 54       | M116/03/2    | spleen                        | 2003 | porpoise             | <i>Phocoena phocoena</i>          | Scotland    | 23     |      |
| bmar178 | 55       | M78/05/2     | vertebral lesion              | 2005 | porpoise             | <i>Phocoena phocoena</i>          | Scotland    | 23     | ST23 |
| bmar311 | 56       | M49/01/2     | liver                         | 2001 | porpoise             | <i>Phocoena phocoena</i>          | Scotland    | 23     |      |
| bmar233 | 57       | M150/03/3    | spleen                        | 2003 | porpoise             | <i>Phocoena phocoena</i>          | Scotland    | 23     |      |
| bmar291 | 58       | M52/01/2     | spleen                        | 2001 | AWSD                 | <i>Lagenorhynchus acutus</i>      | Scotland    | 23     |      |
| bmar365 | 59       | M234/05/2    | lung                          | 2005 | porpoise             | <i>Phocoena phocoena</i>          | Scotland    | 23     | ST23 |
| bmar314 | 60       | M12/04/8     | spinal abscess                | 2004 | porpoise             | <i>Phocoena phocoena</i>          | Scotland    | 23     |      |
| bmar269 | 60       | M90/06/4     | spleen                        | 2006 | porpoise             | <i>Phocoena phocoena</i>          | Scotland    | 23     |      |
| bmar183 | 60       | M291/03/2    | blubber                       | 2003 | porpoise             | <i>Phocoena phocoena</i>          | Scotland    | 23     |      |
| bmar147 | 61       | M493/99/1    | liver                         | 1999 | porpoise             | <i>Phocoena phocoena</i>          | Scotland    | 23     |      |
| bmar360 | 62       | M54/07/11    | lung                          | 2007 | porpoise             | <i>Phocoena phocoena</i>          | Scotland    | 23     |      |
| bmar163 | 62       | M46/01/2     | sub-blubber abscess           | 2001 | porpoise             | <i>Phocoena phocoena</i>          | Scotland    | 23     | ST23 |
| bmar186 | 63       | M93/04/3     | lung                          | 2004 | porpoise             | <i>Phocoena phocoena</i>          | Scotland    | 23     |      |
| bmar378 | 63       | M97/06/1     | MLN                           | 2006 | porpoise             | <i>Phocoena phocoena</i>          | Scotland    | 23     |      |
| bmar177 | 64       | M74/05/2     | kidney                        | 2005 | porpoise             | <i>Phocoena phocoena</i>          | Scotland    | 23     | ST23 |
| bmar332 | 64       | M137/05/4    | liver                         | 2005 | porpoise             | <i>Phocoena phocoena</i>          | Scotland    | 23     | ST23 |
| bmar195 | 65       | B202R-F7     |                               | 1992 | minke whale          | <i>Balaenoptera acutorostrata</i> | Norway      | 23     | ST23 |
| bmar260 | 65       | AFSSA 05-068 |                               | 2005 | porpoise             | <i>Phocoena phocoena</i>          | France      | 23     |      |
| bmar301 | 66       | M217/03/4    | mammary gland                 | 2003 | porpoise             | <i>Phocoena phocoena</i>          | Scotland    | 23     |      |
| bmar184 | 67       | M38/04/3     | thymus lesion                 | 2004 | porpoise             | <i>Phocoena phocoena</i>          | Scotland    | 23     |      |
| bmar180 | 68       | M61/05/1     | meninges                      | 2005 | AWSD                 | <i>Lagenorhynchus acutus</i>      | Scotland    | 23     |      |
| bmar296 | 68       | M147/08/2    | kidney                        | 2008 | porpoise             | <i>Phocoena phocoena</i>          | Scotland    | 23     |      |
| bmar374 | 68       | M199/04/3    | spinal lesion                 | 2004 | porpoise             | <i>Phocoena phocoena</i>          | Scotland    | 23     | ST23 |
| bmar106 | 69       | M39/94/1     | mammary                       | 1994 | porpoise             | <i>Phocoena phocoena</i>          | Scotland    | 23     | ST23 |
| bmar181 | 70       | M199/04/2    | liver                         | 2004 | porpoise             | <i>Phocoena phocoena</i>          | Scotland    | 23     | ST23 |
| bmar116 | 71       | M2788/97/1   | spleen                        | 1997 | AWSD                 | <i>Lagenorhynchus acutus</i>      | Scotland    | 23     |      |
| bmar213 | 72       | M2788/97/2   |                               | 1997 | AWSD                 | <i>Lagenorhynchus acutus</i>      | Scotland    | 23     |      |
| bmar222 | 73       | M117/01/1    | epididymis                    | 2001 | porpoise             | <i>Phocoena phocoena</i>          | Scotland    | 23     |      |
| bmar254 | 74       | M195/03/10   | milk of left mammary gland    | 2003 | porpoise             | <i>Phocoena phocoena</i>          | Scotland    | 70     |      |
