# Supplementary material for: MLVA-16 typing of 295 marine mammal Brucella isolates from different animal and geographic origins identifies 7 major groups within Brucella ceti and Brucella pinnipedialis
Source: Springer Nature journal article supplement (doi:10.1186/1471-2180-9-145), 2009-07-20

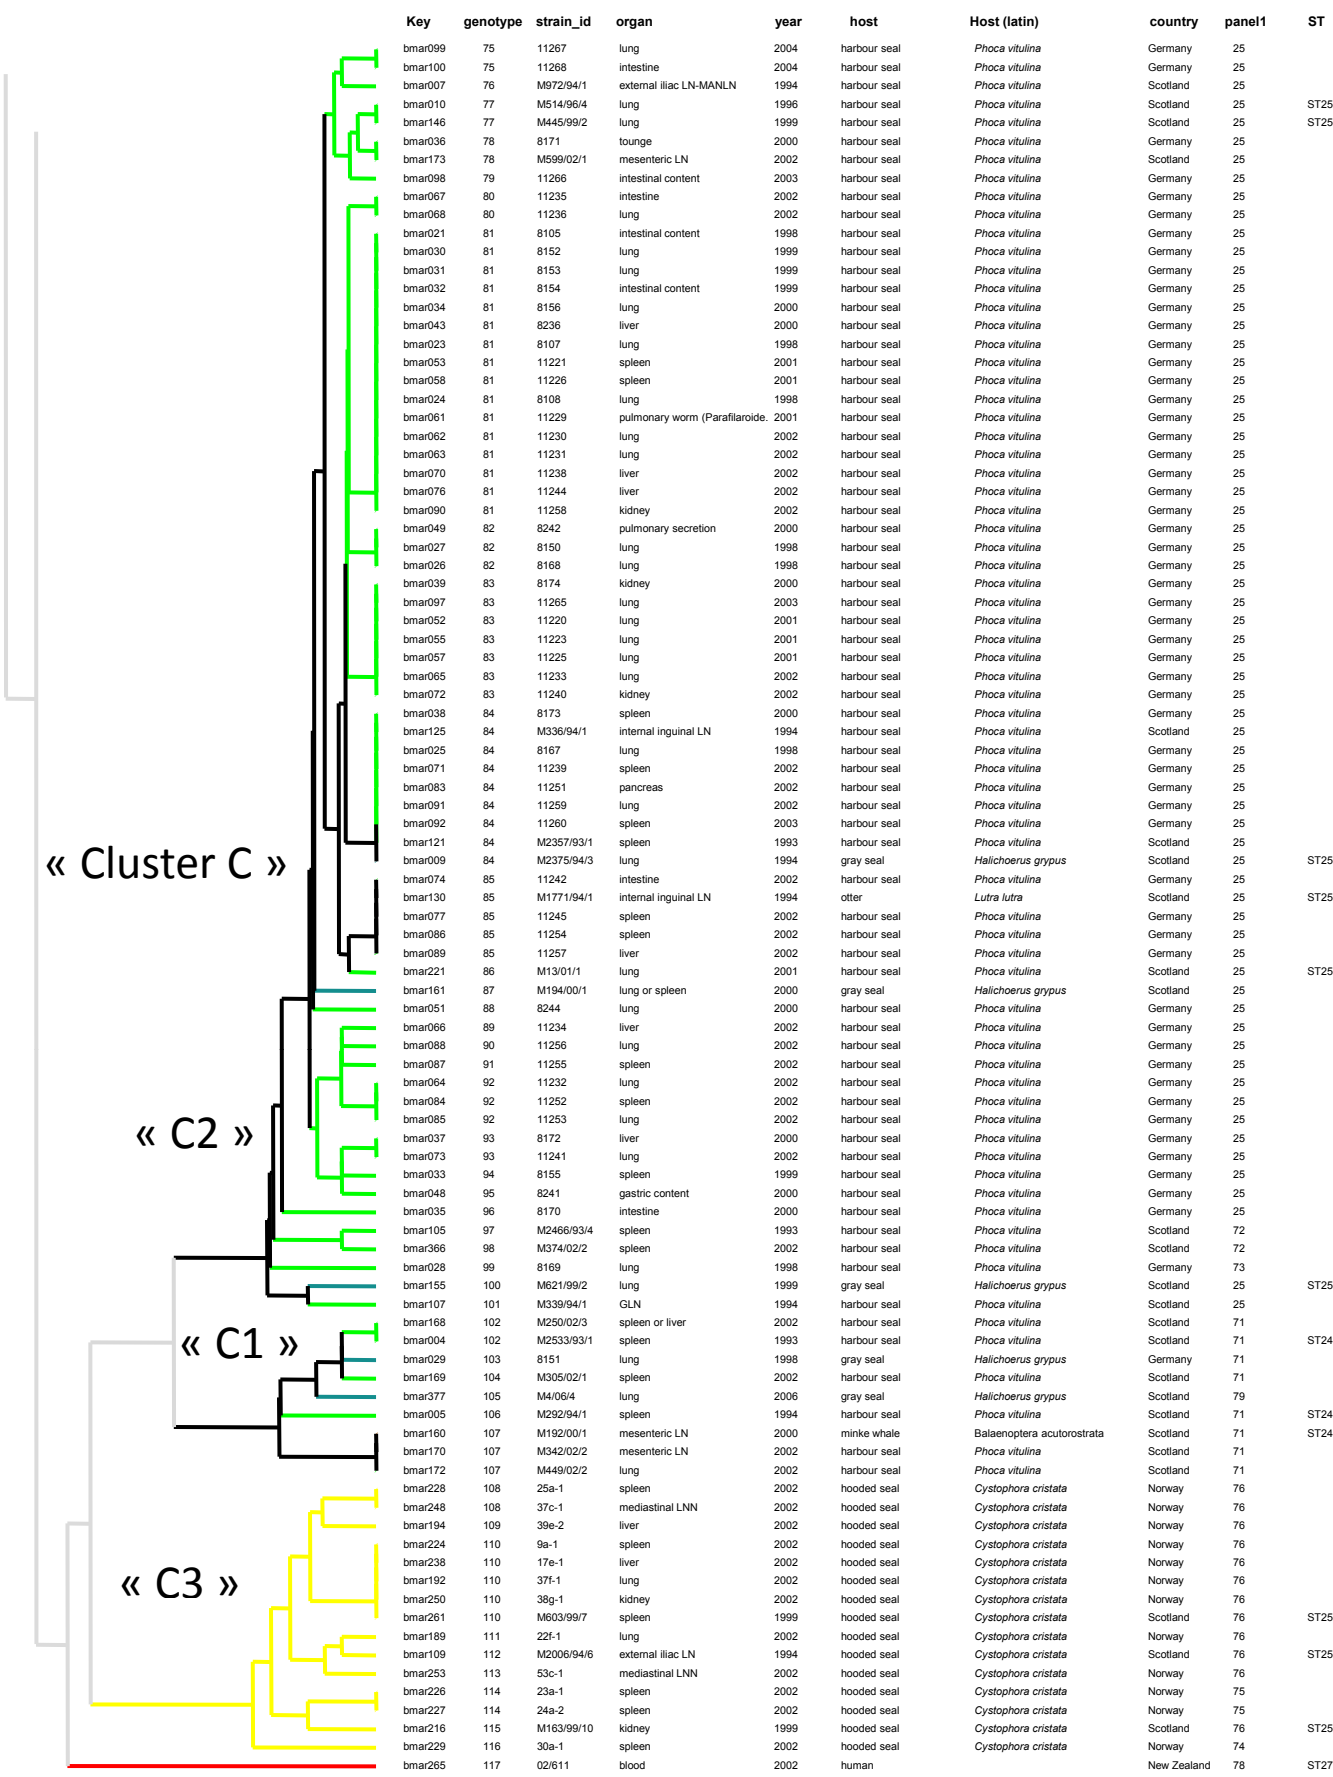

Supplement: 12866_2009_816_MOESM3_ESM.pdf [file 12866_2009_816_MOESM3_ESM.pdf]
